# Supplementary material
Source: publisher figshare collection journal article supplement (https://tandf.figshare.com/ndownloader/files/7302872)
Supplement: Supplementary file 1 [file 7302872]

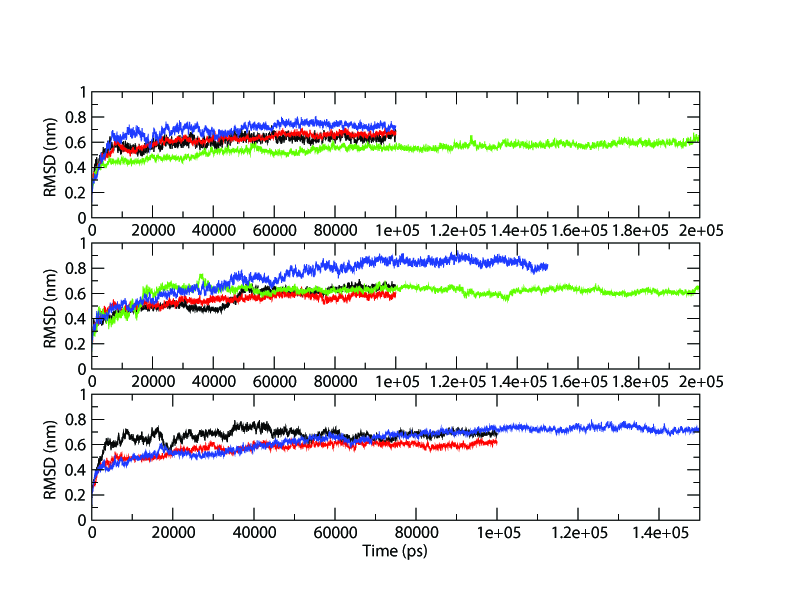


**Supplementary Figure 1** RMSD plots of the simulations involving native RecA (top panel), complexes with one bound ATP (middle panel) and two bound ATPs (bottom panel). Mt:black, Ms1:red, Ms4:green and Ec:blue*.*
